# Supplementary material for: The significance of cirrhosis in cases with intra-hepatic cholangiocarcinoma: A SEER-based retrospective cohort study
Source: Research Square preprint supplement (doi:10.21203/rs.3.rs-4629057/v1), 2024-07-19
Supplement: Supplementary file 1 [file 6ac22be1a830e690ec1b5498.docx]

| **Table 1 Baseline characteristics of the entire cohort before PSM** | | | | | |
| --- | --- | --- | --- | --- | --- |
| **Variables** | **Groups** | **Total number (n=644)** | **Cases with cirrhosis (n=213)** | **Cases without cirrhosis (n=431)** | **P value** |
|  |
| Age (%) | <=60 | 208 (32.3) | 72 (33.8) | 136 (31.6) | 0.566 |  |
|  | >60 | 436 (67.7) | 141 (66.2) | 295 (68.4) |  |  |
| Sex (%) | Male | 372 (57.8) | 154 (72.3) | 218 (50.6) | <0.001 |  |
|  | Female | 272 (42.2) | 59 (27.7) | 213 (49.4) |  |  |
| Racial status (%) | Asian | 107 (16.6) | 27 (12.7) | 80 (18.6) | 0.118 |  |
|  | White | 487 (75.6) | 166 (77.9) | 321 (74.5) |  |  |
|  | Others | 50 (7.8) | 20 (9.4) | 30 ( 7.0) |  |  |
| Grade (%) | Well to moderate | 225 (34.9) | 68 (31.9) | 157 (36.4) | 0.510 |  |
|  | Poorly to undifferentiated | 151 (23.4) | 51 (23.9) | 100 (23.2) |  |  |
|  | Unknown | 268 (41.6) | 94 (44.1) | 174 (40.4) |  |  |
| Pathological subtypes (%) | Pure AC | 629 (97.7) | 203 (95.3) | 426 (98.8) | 0.005 |  |
|  | Others | 15 (2.3) | 10 (4.7) | 5 ( 1.2) |  |  |
| T stage (%) | T1-T2 | 535 (83.1) | 187 (87.8) | 348 (80.7) | 0.025 |  |
|  | T3-T4 | 109 (16.9) | 26 (12.2) | 83 (19.3) |  |  |
| N stage (%) | N- | 460 (71.4) | 155 (72.8) | 305 (70.8) | 0.596 |  |
|  | N+ | 184 (28.6) | 58 (27.2) | 126 (29.2) |  |  |
| M stage (%) | M- | 478 (74.2) | 156 (73.2) | 322 (74.7) | 0.688 |  |
|  | M+ | 166 (25.8) | 57 (26.8) | 109 (25.3) |  |  |
| Radiotherapy (%) | Not performed | 603 (93.6) | 206 (96.7) | 397 (92.1) | 0.024 |  |
|  | Performed | 41 (6.4) | 7 ( 3.3) | 34 ( 7.9) |  |  |
| Chemotherapy (%) | Not performed | 302 (46.9) | 116 (54.5) | 186 (43.2) | 0.007 |  |
|  | Performed | 342 (53.1) | 97 (45.5) | 245 (56.8) |  |  |
| CRD (%) | No/unknown | 198 (30.7) | 58 (27.2) | 140 (32.5) | 0.174 |  |
|  | Yes | 446 (69.3) | 155 (72.8) | 291 (67.5) |  |  |
| Marital status (%) | Married | 389 (60.4) | 123 (57.7) | 266 (61.7) | 0.332 |  |
|  | Single/unknown | 255 (39.6) | 90 (42.3) | 165 (38.3) |  |  |
| Surgery (%) | Not performed | 362 (56.2) | 134 (62.9) | 228 (52.9) | 0.016 |  |
|  | Performed | 282 (43.8) | 79 (37.1) | 203 (47.1) |  |  |
| AC: adenocarcinoma; CRD: cancer-related death; -: negative; +: positive; PSM: propensity score matching | | | | | |  |
|  |
