# Supplementary material for: The significance of cirrhosis in cases with intra-hepatic cholangiocarcinoma: A SEER-based retrospective cohort study
Source: Research Square preprint supplement (doi:10.21203/rs.3.rs-4629057/v1), 2024-07-19
Supplement: Supplementary file 2 [file 8a56535e3c21855708b19471.docx]

| **Table 4 Baseline characteristics of the entire cohort after PSM** | | | | | |
| --- | --- | --- | --- | --- | --- |
| **Variables** | **Groups** | **Total number (n=406)** | **Cases with cirrhosis (n=203)** | **Cases without cirrhosis (n=203)** | **P value** |
|  |
| Age (%) | <=60 | 133 (32.8) | 65 (32.0) | 68 (33.5) | 0.751 |  |
|  | >60 | 273 (67.2) | 138 (68.0) | 135 (66.5) |  |  |
| Sex (%) | Male | 291 (71.7) | 144 (70.9) | 147 (72.4) | 0.741 |  |
|  | Female | 115 (28.3) | 59 (29.1) | 56 (27.6) |  |  |
| Racial status (%) | Asian | 74 (18.2) | 26 (12.8) | 48 (23.6) | 0.017 |  |
|  | White | 298 (73.4) | 158 (77.8) | 140 (69.0) |  |  |
|  | Others | 34 ( 8.4) | 19 ( 9.4) | 15 ( 7.4) |  |  |
| Grade (%) | Well to moderate | 131 (32.3) | 64 (31.5) | 67 (33.0) | 0.882 |  |
|  | Poorly to undifferentiated | 98 (24.1) | 48 (23.6) | 50 (24.6) |  |  |
|  | Unknown | 177 (43.6) | 91 (44.8) | 86 (42.4) |  |  |
| Pathological subtypes (%) | Pure AC | 394 (97.0) | 194 (95.6) | 200 (98.5) | 0.079 |  |
|  | Others | 12 ( 3.0) | 9 ( 4.4) | 3 ( 1.5) |  |  |
| T stage (%) | T1-T2 | 349 (86.0) | 177 (87.2) | 172 (84.7) | 0.475 |  |
|  | T3-T4 | 57 (14.0) | 26 (12.8) | 31 (15.3) |  |  |
| N stage (%) | N- | 295 (72.7) | 145 (71.4) | 150 (73.9) | 0.578 |  |
|  | N+ | 111 (27.3) | 58 (28.6) | 53 (26.1) |  |  |
| M stage (%) | M- | 302 (74.4) | 150 (73.9) | 152 (74.9) | 0.820 |  |
|  | M+ | 104 (25.6) | 53 (26.1) | 51 (25.1) |  |  |
| Radiotherapy (%) | Not performed | 383 (94.3) | 196 (96.6) | 187 (92.1) | 0.053 |  |
|  | Performed | 23 ( 5.7) | 7 ( 3.4) | 16 ( 7.9) |  |  |
| Chemotherapy (%) | Not performed | 204 (50.2) | 111 (54.7) | 93 (45.8) | 0.074 |  |
|  | Performed | 202 (49.8) | 92 (45.3) | 110 (54.2) |  |  |
| CRD (%) | No/unknown | 116 (28.6) | 55 (27.1) | 61 (30.0) | 0.510 |  |
|  | Yes | 290 (71.4) | 148 (72.9) | 142 (70.0) |  |  |
| Marital status(%) | Married | 245 (60.3) | 119 (58.6) | 126 (62.1) | 0.478 |  |
|  | Single/unknown | 161 (39.7) | 84 (41.4) | 77 (37.9) |  |  |
| Surgery (%) | Not performed | 243 (59.9) | 125 (61.6) | 118 (58.1) | 0.479 |  |
|  | Performed | 163 (40.1) | 78 (38.4) | 85 (41.9) |  |  |
| AC: adenocarcinoma; CRD: cancer-related death; -: negative; +: positive; PSM: propensity score matching | | | | | |  |
|  |
