# Supplementary material for: The significance of cirrhosis in cases with intra-hepatic cholangiocarcinoma: A SEER-based retrospective cohort study
Source: Research Square preprint supplement (doi:10.21203/rs.3.rs-4629057/v1), 2024-07-19
Supplement: Supplementary file 3 [file 9bb1580f39b6015d2a816315.docx]

| Table 3 Univariate and multi-variate cox regression for OS and CSS based on the perform of surgery | | | | | | | | | |
| --- | --- | --- | --- | --- | --- | --- | --- | --- | --- |
| OS | | | | | | | | | |
| Variables | Groups | Surgery performed | | | | Surgery not performed | | | |
| Univariate analysis | | Multi-variate analysis | | Univariate analysis | | Multi-variate analysis | |
| HR(95%CI) | P value | HR(95%CI) | P value | HR(95%CI) | P value | HR(95%CI) | P value |
| Age | <=60 | **——** | |  |  | **——** | |  |  |
|  | >60 | 1.216(0.874,1.693) | 0.247 |  |  | 1.109(0.879,1.399) | 0.382 |  |  |
| Sex | Male | **——** | |  |  | **——** | |  |  |
|  | Female | 0.979(0.716,1.338) | 0.894 |  |  | 0.833(0.671,1.035) | 0.100 |  |  |
| Racial status | Asian | **——** | |  |  | **——** | |  |  |
|  | White | 1.143(0.738,1.771) | 0.548 |  |  | 1.194(0.894,1.595) | 0.229 |  |  |
|  | Others | 0.887(0.434,1.811) | 0.741 |  |  | 1.080(0.668,1.744) | 0.754 |  |  |
| Marital status | Married | **——** | |  |  | **——** | |  |  |
|  | Single/unknown | 1.176(0.849,1.628) | 0.329 |  |  | 1.064(0.859,1.317) | 0.572 |  |  |
| Cirrhosis | No | **——** | |  |  | **——** | |  |  |
|  | Yes | 1.104(0.784,1.556) | 0.571 |  |  | 0.956(0.767,1.193) | 0.691 |  |  |
| Grade | Well to moderate | **——** | |  |  | **——** | | **——** | |
|  | Poorly to undifferentiated | 1.187(0.834,1.691) | 0.342 |  |  | 1.349(0.940,1.936) | 0.104 | 1.547(1.076,2.225) | 0.018 |
|  | Unknown | 0.791(0.488,1.283) | 0.342 |  |  | 1.692(1.252,2.288) | 0.001 | 1.825(1.346,2.475) | <0.001 |
| Pathological subtypes | Pure AC | **——** | |  |  | **——** | |  |  |
|  | Others | 0.320(0.102,1.007) | 0.052 |  |  | 1.830(0.680,4.920) | 0.231 |  |  |
| T stage | T1-T2 | **——** | | **——** | | **——** | | **——** | |
|  | T3-T4 | 1.795(1.192,2.704) | 0.005 | 1.630(1.079,2.464) | 0.020 | 1.329(1.013,1.743) | 0.040 | 1.250(0.950,1.644) | 0.111 |
| N stage | N- | **——** | | **——** | | **——** | | **——** | |
|  | N+ | 2.335(1.621,3.363) | <0.001 | 2.154(1.476,3.142) | <0.001 | 1.443(1.156,1.801) | 0.001 | 1.330(1.043,1.697) | 0.021 |
| M stage | M- | **——** | | **——** | | **——** | | **——** | |
|  | M+ | 2.145(1.005,4.582) | 0.049 | 1.413(0.647,3.087) | 0.385 | 2.204(1.766,2.750) | <0.001 | 2.561(2.001,3.276) | <0.001 |
| Chemotherapy | Not performed | **——** | |  |  | **——** | | **——** | |
|  | Performed | 1.047(0.765,1.434) | 0.772 |  |  | 0.522(0.421,0.647) | <0.001 | 0.409(0.326,0.513) | <0.001 |
| Radiotherapy | Not performed | **——** | |  |  | **——** | |  |  |
|  | Performed | 1.051(0.650,1.699) | 0.838 |  |  | 0.620(0.276,1.391) | 0.246 |  |  |
| CSS | | | | | | | | | |
| Age | <=60 | **——** | |  |  | **——** | |  |  |
|  | >60 | 1.130(0.791,1.612) | 0.502 |  |  | 1.122(0.882,1.429) | 0.348 |  |  |
| Sex | Male | **——** | |  |  | **——** | | **——** | |
|  | Female | 0.896(0.638,1.257) | 0.524 |  |  | 0.784(0.623,0.987) | 0.038 | 0.782(0.621,0.986) | 0.038 |
| Racial status | Asian | **——** | |  |  | **——** | |  |  |
|  | White | 0.948(0.598,1.501) | 0.818 |  |  | 1.059(0.782,1.434) | 0.711 |  |  |
|  | Others | 0.740(0.337,1.622) | 0.452 |  |  | 1.563(0.930,2.628) | 0.092 |  |  |
| Marital status | Married | **——** | | **——** | | **——** | |  |  |
|  | Single/unknown | 1.438(1.003,2.061) | 0.048 | 1.375(0.945,2.000) | 0.096 | 1.032(0.823,1.294) | 0.787 |  |  |
| Cirrhosis | No | **——** | |  |  | **——** | |  |  |
|  | Yes | 1.247(0.870,1.788) | 0.230 |  |  | 1.129(0.895,1.426) | 0.306 |  |  |
| Grade | Well to moderate | **——** | |  |  | **——** | |  |  |
|  | Poorly to undifferentiated | 1.223(0.837,1.789) | 0.298 |  |  | 1.366(0.934,1.996) | 0.107 |  |  |
|  | Unknown | 0.854(0.497,1.465) | 0.566 |  |  | 1.290(0.940,1.771) | 0.114 |  |  |
| Pathological subtypes | Pure AC | **——** | |  |  | **——** | |  |  |
|  | Others | 2.131(0.674,6.745) | 0.198 |  |  | 1.656(0.615,4.459) | 0.318 |  |  |
| T stage | T1-T2 | **——** | | **——** | | **——** | |  |  |
|  | T3-T4 | 1.548(1.010,2.374) | 0.045 | 1.590(1.015,2.489) | 0.043 | 1.115(0.839,1.482) | 0.455 |  |  |
| N stage | N- | **——** | | **——** | | **——** | | **——** | |
|  | N+ | 1.576(1.078,2.303) | 0.019 | 1.424(0.951,2.132) | 0.086 | 1.261(1.002,1.587) | 0.048 | 1.132(0.881,1.454) | 0.334 |
| M stage | M- | **——** | | **——** | | **——** | | **——** | |
|  | M+ | 2.289(1.061,4.938) | 0.035 | 1.626(0.721,3.664) | 0.241 | 2.108(1.668,2.663) | <0.001 | 2.420(1.867,3.136) | <0.001 |
| Chemotherapy | Not performed | **——** | |  |  | **——** | | **——** | |
|  | Performed | 0.969(0.692,1.358) | 0.857 |  |  | 0.505(0.402,0.635) | <0.001 | 0.395(0.310,0.503) | <0.001 |
| Radiotherapy | Not performed | **——** | |  |  | **——** | | **——** | |
|  | Performed | 1.278(0.767,2.131) | 0.347 |  |  | 0.401(0.165,0.974) | 0.044 | 0.485(0.198,1.187) | 0.113 |
| AC: adenocarcinoma; CRD: cancer-related death; -: negative; +: positive; HR: hazard ratio; CI: confidence interval; OS: overall survival; CSS: cancer-specific survival; ——: reference. | | | | | | | | | |
|  |
