# Supplementary material for: The significance of cirrhosis in cases with intra-hepatic cholangiocarcinoma: A SEER-based retrospective cohort study
Source: Research Square preprint supplement (doi:10.21203/rs.3.rs-4629057/v1), 2024-07-19
Supplement: Supplementary file 4 [file bc86bb7cb8d86c2bc2236ae8.docx]

| Table 2 Univariate and multi-variate cox regression for OS and CSS of the entire cohort | | | | | | | | | |
| --- | --- | --- | --- | --- | --- | --- | --- | --- | --- |
|  | OS | | | | | CSS | | | |
| Variables | Groups | Univariate analysis | | Multi-variate analysis | | Univariate analysis | | Multi-variate analysis | |
| HR(95%CI) | P value | HR(95%CI) | P value | HR(95%CI) | P value | HR(95%CI) | P value |
| Age | <=60 | —— | |  |  | —— | |  |  |
|  | >60 | 1.208(0.999,1.460) | 0.051 |  |  | 1.142(0.936,1.393) | 0.191 |  |  |
| Sex | Male | —— | |  |  | —— | |  |  |
|  | Female | 0.869(0.728,1.038) | 0.122 |  |  | 0.839(0.694,1.015) | 0.070 |  |  |
| Racial status | Asian | —— | |  |  | —— | |  |  |
|  | White | 1.119(0.879,1.423) | 0.361 |  |  | 0.998(0.775,1.285) | 0.989 |  |  |
|  | Others | 0.962(0.647,1.432) | 0.850 |  |  | 1.045(0.678,1.611) | 0.843 |  |  |
| Marital status | Married | —— | | —— | | —— | | —— | |
|  | Single/unknown | 1.290(1.079,1.541) | 0.005 | 1.157(0.967,1.386) | 0.112 | 1.311(1.084,1.586) | 0.005 | 1.173(0.966,1.424) | 0.107 |
| Cirrhosis | No | —— | |  |  | —— | |  |  |
|  | Yes | 1.173(0.975,1.411) | 0.091 |  |  | 1.203(0.989,1.462) | 0.064 |  |  |
| Grade | Well to moderate | —— | | —— | | —— | | —— | |
|  | Poorly to undifferentiated | 1.518(1.187,1.941) | 0.001 | 1.247(0.971,1.601) | 0.084 | 1.467(1.129,1.907) | 0.004 | 1.393(1.065,1.823) | 0.016 |
|  | Unknown | 2.734(2.220,3.367) | <0.001 | 1.552(1.235,1.950) | <0.001 | 2.001(1.601,2.501) | <0.001 | 1.289(1.005,1.654) | 0.046 |
| Pathological subtypes | Pure AC | —— | | —— | | —— | |  |  |
|  | Others | 0.402(0.190,0.849) | 0.017 | 0.606(0.283,1.294) | 0.195 | 1.482(0.702,3.132) | 0.302 |  |  |
| T stage | T1-T2 | —— | | —— | | —— | |  |  |
|  | T3-T4 | 1.531(1.221,1.920) | <0.001 | 1.424(1.132,1.789) | 0.002 | 1.255(0.991,1.588) | 0.059 |  |  |
| N stage | N- | —— | | —— | | —— | | —— | |
|  | N+ | 2.096(1.734,2.534) | <0.001 | 1.450(1.183,1.778) | <0.001 | 1.480(1.216,1.802) | <0.001 | 1.273(1.028,1.577) | 0.027 |
| M stage | M- | —— | | —— | | —— | | —— | |
|  | M+ | 4.226(3.457,5.167) | <0.001 | 2.154(1.726,2.688) | <0.001 | 3.128(2.527,3.871) | <0.001 | 2.503(1.957,3.203) | <0.001 |
| Chemotherapy | Not performed | —— | |  |  | —— | | —— | |
|  | Performed | 0.926(0.776,1.105) | 0.391 |  |  | 0.796(0.660,0.960) | 0.017 | 0.484(0.394,0.594) | <0.001 |
| Radiotherapy | Not performed | —— | | —— | | —— | | —— | |
|  | Performed | 0.539(0.361,0.806) | 0.003 | 0.895(0.591,1.354) | 0.598 | 0.623(0.405,0.957) | 0.031 | 1.022(0.657,1.589) | 0.925 |
| Surgery | Not performed | —— | | —— | | —— | | —— | |
|  | Performed | 0.192(0.157,0.236) | <0.001 | 0.294(0.232,0.372) | <0.001 | 0.307(0.246,0.383) | <0.001 | 0.363(0.277,0.476) | <0.001 |
| AC: adenocarcinoma; CRD: cancer-related death; -: negative; +: positive; HR: hazard ratio; CI: confidence interval; OS: overall survival; CSS: cancer-specific survival; ——: reference. | | | | | | | | | |
|  |
